# Supplementary material for: Effect of Aberrant Long Noncoding RNA on the Prognosis of Clear Cell Renal Cell Carcinoma
Source: Hindawi journal article supplement (doi:10.1155/2021/6533049), 2021-09-03
Supplement: f1 [file 6533049.f1.pdf]

| submitter   | days_to_la | case_id    | gender | race        | vital_status | age_at_inc | days_to_d | years_smo |
|-------------|------------|------------|--------|-------------|--------------|------------|-----------|-----------|
| TCGA-BP-    | 1384       | cdd8eb5c-  | male   | white       | Alive        | 47         | NA        | NA        |
| TCGA-CJ-    | 2231       | 9f4cd3b9-  | male   | white       | Alive        | 61         | NA        | NA        |
| TCGA-B0-    | 1169       | c5bf474c-  | female | white       | Alive        | 72         | NA        | NA        |
| TCGA-BP-    | 1011       | ffb88267-  | male   | white       | Alive        | 61         | NA        | NA        |
| TCGA-CZ-    | 2439       | a43401ae-  | female | white       | Alive        | 59         | NA        | NA        |
| TCGA-AK-    | 1143       | 52e9daf0-  | male   | black or ai | Alive        | 48         | NA        | NA        |
| TCGA-A3-    | 1478       | 36ed3269   | male   | white       | Alive        | 51         | NA        | NA        |
| TCGA-CJ- NA |            | 4edff57f-  | female | white       | Dead         | 54         | 224       | NA        |
| TCGA-B0- NA |            | 5ec1ec7b-  | female | white       | Dead         | 68         | 510       | NA        |
| TCGA-B8-    | 519        | 540cbfa7-  | female | black or ai | Alive        | 49         | NA        | NA        |
| TCGA-B0- NA |            | 123b1a31-  | male   | white       | Dead         | 72         | 106       | NA        |
| TCGA-B0- NA |            | 6a7a0f51-  | female | white       | Dead         | 66         | 238       | NA        |
| TCGA-BP-    | 406        | f217a4f9-  | male   | white       | Alive        | 54         | NA        | NA        |
| TCGA-GK-    | 61         | 0df9ec46-  | female | black or ai | Alive        | 76         | NA        | NA        |
| TCGA-B0- NA |            | 949736aa-  | male   | white       | Dead         | 55         | 139       | NA        |
| TCGA-CZ- NA |            | 2efcefca-  | male   | white       | Dead         | 68         | 1404      | NA        |
| TCGA-BP- NA |            | a5d34ea3-  | male   | white       | Dead         | 74         | 334       | NA        |
| TCGA-A3- NA |            | 0c139772-  | male   | not report  | Dead         | 57         | 1191      | NA        |
| TCGA-CZ-    | 2789       | c4247ccb-  | male   | white       | Alive        | 43         | NA        | NA        |
| TCGA-B0-    | 2461       | 8f8a632d-  | male   | white       | Alive        | 65         | NA        | NA        |
| TCGA-BP-    | 205        | 19cd6d5b-  | male   | white       | Alive        | 76         | NA        | NA        |
| TCGA-CJ-    | 3302       | ec3b2a30-  | female | white       | Alive        | 60         | NA        | NA        |
| TCGA-B2-    | 507        | fc7065fc-  | male   | black or ai | Alive        | 61         | NA        | 46        |
| TCGA-EU-    | 206        | 68a1a23a-  | male   | white       | Alive        | 55         | NA        | NA        |
| TCGA-BP-    | 411        | b15f495d-  | male   | white       | Alive        | 52         | NA        | NA        |
| TCGA-B0-    | 18         | 8942ebfa-  | male   | white       | Dead         | 68         | 18        | NA        |
| TCGA-AK-    | 3409       | fdada296a- | female | white       | Alive        | 48         | NA        | NA        |
| TCGA-CZ-    | 2422       | 467bf226-  | male   | white       | Alive        | 57         | NA        | NA        |
| TCGA-BP- NA |            | 2dde6b93   | male   | white       | Dead         | 42         | 1343      | NA        |
| TCGA-T7-    | 356        | df1e2e79-  | female | black or ai | Alive        | 47         | NA        | NA        |
| TCGA-CJ-    | 1855       | 4467ae73-  | male   | white       | Dead         | 77         | 3615      | NA        |
| TCGA-B0- NA |            | e9f855b3-  | male   | white       | Dead         | 33         | 222       | NA        |
| TCGA-CZ- NA |            | 305eaef4-  | female | white       | Dead         | 70         | 166       | NA        |
| TCGA-B4-    | 16         | 1bc2ad71-  | female | white       | Alive        | 64         | NA        | NA        |
| TCGA-B2-    | 992        | 08a8eec3-  | male   | white       | Alive        | 59         | NA        | NA        |
| TCGA-CW     | 3222       | 4100b960   | male   | white       | Alive        | 60         | NA        | NA        |
| TCGA-CJ-    | 1416       | b7719c71-  | male   | white       | Alive        | 48         | NA        | NA        |
| TCGA-CJ-    | 1759       | 4fd166d4-  | female | white       | Alive        | 72         | NA        | NA        |
| TCGA-B0- NA |            | ac30d54e-  | male   | white       | Dead         | 49         | 2090      | NA        |
| TCGA-CJ-    | 1657       | a8db1341   | male   | white       | Alive        | 61         | NA        | NA        |
| TCGA-CZ-    | 1789       | e9faa588-  | male   | white       | Alive        | 69         | NA        | NA        |
| TCGA-BP-    | 1126       | 3cfe743c-  | male   | white       | Alive        | 53         | NA        | NA        |
| TCGA-BP-    | 1955       | ff9328d5-  | male   | white       | Alive        | 64         | NA        | NA        |
| TCGA-B0- NA |            | 11111b58   | male   | white       | Dead         | 71         | 480       | NA        |
| TCGA-BP-    | 1746       | 1e417b93   | male   | white       | Alive        | 40         | NA        | NA        |
| TCGA-CZ- NA |            | d5213422   | male   | white       | Dead         | 56         | 1432      | NA        |
| TCGA-B2-    | 755        | 597c81a3-  | male   | white       | Alive        | 74         | NA        | NA        |
| TCGA-CJ- NA |            | 33cd8b05   | female | white       | Dead         | 69         | 1714      | NA        |
| TCGA-B0- NA |            | df3b1215-  | female | white       | Dead         | 72         | 77        | NA        |
| TCGA-A3-    | 1186       | 4fca10bd-  | male   | white       | Alive        | 51         | NA        | NA        |
| TCGA-B0- NA |            | 0bd313f0-  | male   | white       | Dead         | 54         | 883       | NA        |
| TCGA-A3-    | 1559       | c7e9ba09-  | female | white       | Alive        | 60         | NA        | NA        |
| TCGA-CJ- NA |            | 3fa6c93e-  | male   | white       | Dead         | 73         | 679       | NA        |
| TCGA-B8-    | 53         | ea456a1f-  | male   | black or ai | Alive        | 50         | NA        | NA        |
| TCGA-BP-    | 932        | 5c73b91a-  | male   | asian       | Alive        | 49         | NA        | NA        |
| TCGA-B2-    | 963        | 7d35b1e4   | male   | white       | Alive        | 56         | NA        | NA        |
| TCGA-B4-    | 11         | aa82fb26-  | male   | white       | Alive        | 45         | NA        | NA        |

|            |      |           |        |             |       |    |      |    |
|------------|------|-----------|--------|-------------|-------|----|------|----|
| TCGA-CJ-   | 3451 | 5338d435  | male   | white       | Alive | 64 | NA   | NA |
| TCGA-A3-   | 1130 | 22b6724c  | male   | white       | Alive | 70 | NA   | NA |
| TCGA-BP-   | 501  | a5790b81  | male   | white       | Alive | 66 | NA   | NA |
| TCGA-CJ-   | 3987 | 960d1eaf- | male   | white       | Alive | 51 | NA   | NA |
| TCGA-BP-   | 1433 | d97ac1d1  | male   | white       | Alive | 40 | NA   | NA |
| TCGA-AK-   | 3328 | b3a6acab  | female | white       | Alive | 54 | NA   | NA |
| TCGA-CJ-   | 3341 | c1b46fd8- | female | white       | Alive | 79 | NA   | NA |
| TCGA-A3-   | 1385 | 0bbfeec1- | female | white       | Alive | 34 | NA   | NA |
| TCGA-B8-   | 150  | 7e620e32  | male   | black or at | Alive | 48 | NA   | NA |
| TCGA-B8-   | 511  | cba5705a- | female | white       | Alive | 41 | NA   | NA |
| TCGA-B0-NA |      | 1b0ad45e  | female | white       | Dead  | 73 | 1724 | NA |
| TCGA-CZ-   | 3271 | b10eb61b  | male   | white       | Alive | 46 | NA   | NA |
| TCGA-BP-   | 970  | a8e0f80a- | female | white       | Alive | 51 | NA   | NA |
| TCGA-B0-NA |      | 4ee14e95  | male   | white       | Dead  | 60 | 313  | NA |
| TCGA-CJ-   | 1946 | f964511a- | female | white       | Alive | 63 | NA   | NA |
| TCGA-B0-NA |      | 18bcef21- | female | white       | Dead  | 46 | 578  | NA |
| TCGA-B0-   | 1782 | 171044a9  | male   | white       | Alive | 54 | NA   | NA |
| TCGA-B0-NA |      | 77d8c2cf- | male   | white       | Dead  | 63 | 204  | NA |
| TCGA-BP-NA |      | 31201e73  | male   | white       | Dead  | 62 | 162  | NA |
| TCGA-CZ-NA |      | f2801b21- | male   | white       | Dead  | 63 | 722  | NA |
| TCGA-B8-NA |      | dfa9513d- | female | white       | Dead  | 66 | 709  | NA |
| TCGA-BP-   | 1632 | 2375ef64- | male   | white       | Alive | 77 | NA   | NA |
| TCGA-A3-   | 1886 | c04c5ac6- | male   | white       | Alive | 41 | NA   | NA |
| TCGA-AK-   | 2531 | fd5728e0- | female | white       | Alive | 58 | NA   | NA |
| TCGA-BP-NA |      | f9e6afeb- | male   | white       | Dead  | 61 | 375  | NA |
| TCGA-B0-   | 3631 | d26f3a6b- | male   | black or at | Alive | 77 | NA   | NA |
| TCGA-CJ-   | 1450 | e45166cb  | male   | white       | Alive | 47 | NA   | NA |
| TCGA-B8-   | 505  | 7aece0e0- | female | black or at | Alive | 38 | NA   | NA |
| TCGA-B8-   | 469  | a2663a86  | male   | black or at | Alive | 61 | NA   | NA |
| TCGA-CZ-   | 662  | 8e9e684c  | male   | white       | Alive | 76 | NA   | NA |
| TCGA-MM    | 700  | aa2b6825  | female | black or at | Alive | 58 | NA   | NA |
| TCGA-B0-NA |      | 3be0bc1d  | female | black or at | Dead  | 53 | 1584 | NA |
| TCGA-A3-   | 1307 | 8a575e00  | female | white       | Alive | 57 | NA   | NA |
| TCGA-A3-   | 1508 | 50f29fc7- | female | white       | Alive | 52 | NA   | NA |
| TCGA-BP-   | 693  | 2f38a984- | female | white       | Alive | 50 | NA   | NA |
| TCGA-MM    | 607  | 620baefa- | male   | black or at | Alive | 68 | NA   | NA |
| TCGA-BP-   | 749  | d4098753  | male   | white       | Alive | 75 | NA   | NA |
| TCGA-A3-   | 1621 | 2bc5b2ec  | female | white       | Alive | 54 | NA   | NA |
| TCGA-B0-NA |      | 31e9d2fc- | male   | white       | Dead  | 63 | 1378 | NA |
| TCGA-BP-   | 1413 | 62613d1d  | female | asian       | Alive | 67 | NA   | NA |
| TCGA-BP-   | 211  | 33cf0893- | male   | white       | Alive | 42 | NA   | NA |
| TCGA-BP-   | 620  | 38469030  | female | white       | Alive | 74 | NA   | NA |
| TCGA-B0-   | 4074 | db058eb4  | female | white       | Alive | 47 | NA   | NA |
| TCGA-B0-   | 2722 | 514af471- | female | black or at | Alive | 68 | NA   | NA |
| TCGA-B0-NA |      | 0022478c  | male   | white       | Dead  | 53 | 563  | NA |
| TCGA-A3-   | 861  | 46c87ae0- | male   | white       | Alive | 52 | NA   | NA |
| TCGA-CJ-NA |      | 73c712fe- | female | white       | Dead  | 64 | 139  | NA |
| TCGA-BP-   | 951  | 54c9850c  | male   | white       | Alive | 63 | NA   | NA |
| TCGA-A3-   | 2270 | 69fb3eff- | male   | white       | Alive | 72 | NA   | NA |
| TCGA-B2-   | 648  | cfc999aa- | male   | white       | Alive | 52 | NA   | NA |
| TCGA-G6-NA |      | 3f0a2571- | female | black or at | Dead  | 54 | 242  | NA |
| TCGA-BP-   | 967  | b9fc9eff- | male   | white       | Alive | 79 | NA   | NA |
| TCGA-BP-   | 1893 | 453085d8  | male   | white       | Alive | 47 | NA   | NA |
| TCGA-BP-   | 2372 | 02b5012e  | male   | white       | Alive | 50 | NA   | NA |
| TCGA-B8-   | 16   | 07aa333c- | female | black or at | Alive | 65 | NA   | NA |
| TCGA-AK-   | 1168 | d7cf4fc0- | male   | white       | Alive | 48 | NA   | NA |
| TCGA-BP-   | 2718 | e7bbc8a9  | male   | white       | Alive | 59 | NA   | NA |
| TCGA-EU-   | 119  | 4481ca64- | female | white       | Alive | 67 | NA   | NA |

|            |      |                    |             |       |    |      |    |
|------------|------|--------------------|-------------|-------|----|------|----|
| TCGA-B0-NA |      | 616bc43c- male     | white       | Dead  | 81 | 245  | NA |
| TCGA-BP-   | 1291 | 64aa0dd1- male     | white       | Alive | 57 | NA   | NA |
| TCGA-CZ-   | 1929 | 9cdda9fa- male     | white       | Alive | 74 | NA   | NA |
| TCGA-BP-   | 2080 | 80c4fc5b- male     | white       | Alive | 78 | NA   | NA |
| TCGA-B0-   | 1552 | fedcaa7b- female   | white       | Alive | 61 | NA   | NA |
| TCGA-DV    | 1329 | f6d28a1d- male     | white       | Alive | 59 | NA   | NA |
| TCGA-BP-   | 1489 | 9816ac2a- male     | white       | Alive | 48 | NA   | NA |
| TCGA-B0-NA |      | 7a4283eb- male     | white       | Dead  | 46 | 101  | NA |
| TCGA-DV    | 2470 | 01277e9d- male     | black or at | Alive | 55 | NA   | NA |
| TCGA-BP-   | 1876 | dc6f2273- male     | white       | Alive | 63 | NA   | NA |
| TCGA-A3-   | 1436 | 7ac1d6c6- male     | not report  | Alive | 66 | NA   | NA |
| TCGA-BP-NA |      | 39867756- male     | white       | Dead  | 52 | 2454 | NA |
| TCGA-BP-NA |      | 9f5c0a43- male     | white       | Dead  | 63 | 878  | NA |
| TCGA-CJ-   | 3498 | 852effcd- female   | white       | Alive | 60 | NA   | NA |
| TCGA-B0-NA |      | e7c8a4d3- male     | white       | Dead  | 64 | 1598 | NA |
| TCGA-A3-   | 2688 | 4d856b5d- male     | white       | Alive | 62 | NA   | NA |
| TCGA-BP-   | 2964 | b81243b3- female   | white       | Alive | 64 | NA   | NA |
| TCGA-CJ-   | 750  | d65f7f50- female   | white       | Alive | 76 | NA   | NA |
| TCGA-BP-NA |      | 3f05a719- female   | white       | Dead  | 76 | 701  | NA |
| TCGA-A3-   | 910  | ee7011e7- male     | white       | Alive | 42 | NA   | NA |
| TCGA-B0-NA |      | cf67eaf8- female   | white       | Dead  | 72 | 68   | NA |
| TCGA-BP-NA |      | 57959b73- male     | white       | Dead  | 57 | 1493 | NA |
| TCGA-BP-   | 2184 | 6dc3788e- male     | white       | Alive | 43 | NA   | NA |
| TCGA-CZ-   | 2067 | ea26d89f- male     | white       | Alive | 51 | NA   | NA |
| TCGA-B0-   | 2150 | fb9bafa5- female   | white       | Alive | 61 | NA   | NA |
| TCGA-B0-NA |      | 44130745- male     | white       | Dead  | 49 | 1371 | NA |
| TCGA-BP-NA |      | c499b3be- male     | white       | Dead  | 75 | 62   | NA |
| TCGA-B4-   | 38   | afd60992- male     | white       | Alive | 59 | NA   | NA |
| TCGA-B0-NA |      | fb3a387f- female   | white       | Dead  | 90 | 0    | NA |
| TCGA-B0-NA |      | 03b2ac94- male     | white       | Dead  | 77 | 1317 | NA |
| TCGA-CJ-   | 2014 | 24c1cf70- male     | white       | Alive | 41 | NA   | NA |
| TCGA-B0-NA |      | 1380d4cc- male     | white       | Dead  | 88 | 454  | NA |
| TCGA-B0-   | 2172 | 74844571- male     | white       | Alive | 71 | NA   | NA |
| TCGA-B0-   | 1290 | d7ab7ec0- male     | white       | Alive | 64 | NA   | NA |
| TCGA-CJ-   | 1528 | 900b5f21- male     | asian       | Alive | 42 | NA   | NA |
| TCGA-BP-   | 2881 | 844d8b94- male     | white       | Alive | 67 | NA   | NA |
| TCGA-BP-   | 785  | ccd44d97- male     | white       | Alive | 75 | NA   | NA |
| TCGA-B8-   | 256  | 3280a078- female   | black or at | Alive | 69 | NA   | NA |
| TCGA-AK-   | 1217 | d7abeadd- male     | white       | Alive | 83 | NA   | NA |
| TCGA-CJ-NA |      | 267ff78b- male     | white       | Dead  | 64 | 93   | NA |
| TCGA-B0-NA |      | bcbab8ce- male     | white       | Dead  | 74 | 110  | NA |
| TCGA-A3-   | 689  | 52db2d93- female   | black or at | Alive | 49 | NA   | NA |
| TCGA-B0-NA |      | 9cffe9f2-4- female | white       | Dead  | 74 | 2764 | NA |
| TCGA-BP-   | 1133 | e9847c37- male     | white       | Alive | 36 | NA   | NA |
| TCGA-A3-   | 2274 | 9f632fc3- female   | white       | Alive | 48 | NA   | NA |
| TCGA-A3-   | 751  | 9868ae73- male     | white       | Dead  | 52 | 1170 | NA |
| TCGA-CJ-   | 1793 | f11f68ac- female   | white       | Alive | 67 | NA   | NA |
| TCGA-B0-   | 3974 | bf768635- female   | white       | Alive | 62 | NA   | NA |
| TCGA-B0-NA |      | d599ff9b- male     | white       | Dead  | 51 | 182  | NA |
| TCGA-B8-   | 1525 | a1ad1a96- male     | black or at | Alive | 42 | NA   | NA |
| TCGA-B8-   | 1476 | 59278f79- male     | white       | Alive | 71 | NA   | NA |
| TCGA-CW    | 2799 | 2d0f6d4f- male     | white       | Alive | 44 | NA   | NA |
| TCGA-BP-   | 1888 | fdfaf862-4- female | black or at | Alive | 60 | NA   | NA |
| TCGA-BP-   | 1935 | d23d354d- male     | white       | Alive | 47 | NA   | NA |
| TCGA-DV    | 370  | 16559faa- male     | white       | Alive | 26 | NA   | NA |
| TCGA-BP-   | 293  | 8f54d854- female   | white       | Alive | 46 | NA   | NA |
| TCGA-BP-   | 2172 | 0d88e6ab- male     | white       | Alive | 46 | NA   | NA |
| TCGA-A3-   | 1137 | 2e81cfda- male     | white       | Alive | 47 | NA   | NA |

|            |      |          |        |             |       |    |      |    |
|------------|------|----------|--------|-------------|-------|----|------|----|
| TCGA-CJ-   | 646  | 2309c424 | male   | white       | Dead  | 42 | 646  | NA |
| TCGA-BP-   | 1124 | aebe37c4 | female | asian       | Alive | 41 | NA   | NA |
| TCGA-B0-   | 3834 | 326745d8 | male   | white       | Alive | 53 | NA   | NA |
| TCGA-B4-   | 166  | 70820391 | male   | white       | Alive | 52 | NA   | NA |
| TCGA-B0-NA |      | 57578a0d | male   | white       | Dead  | 48 | 1417 | NA |
| TCGA-BP-NA |      | ce0ab696 | female | white       | Dead  | 75 | 1097 | NA |
| TCGA-A3-   | 1993 | 4c44f4a4 | female | white       | Alive | 46 | NA   | NA |
| TCGA-BP-NA |      | 6e9e5e05 | male   | white       | Dead  | 71 | 1912 | NA |
| TCGA-CZ-NA |      | 6949efc1 | male   | white       | Dead  | 60 | 206  | NA |
| TCGA-CJ-NA |      | 5db69ebe | female | white       | Dead  | 65 | 768  | NA |
| TCGA-B0-NA |      | 420409bb | male   | white       | Dead  | 58 | 168  | NA |
| TCGA-A3-   | 735  | 11ab53c8 | male   | white       | Alive | 64 | NA   | NA |
| TCGA-CJ-NA |      | eee108d6 | male   | white       | Dead  | 84 | 1972 | NA |
| TCGA-CJ-NA |      | cdfa3c5d | female | white       | Dead  | 55 | 1661 | NA |
| TCGA-MM    | 591  | fe1f95a3 | male   | black or at | Alive | 41 | NA   | NA |
| TCGA-B0-NA |      | 04004bc7 | male   | white       | Dead  | 57 | 320  | NA |
| TCGA-G6-   | 474  | 6b033bf5 | female | black or at | Dead  | 62 | 1091 | NA |
| TCGA-A3-   | 1257 | a55e63a9 | female | white       | Alive | 86 | NA   | NA |
| TCGA-B0-   | 4537 | 62cf9546 | female | white       | Alive | 65 | NA   | NA |
| TCGA-CZ-   | 685  | 5722df9f | male   | not report  | Alive | 67 | NA   | NA |
| TCGA-BP-   | 1462 | 7b184674 | female | white       | Alive | 43 | NA   | NA |
| TCGA-B8-   | 1218 | e7afc830 | male   | white       | Alive | 56 | NA   | NA |
| TCGA-BP-NA |      | ba96288c | female | white       | Dead  | 51 | 992  | NA |
| TCGA-CJ-   | 3519 | 46d34d0c | male   | white       | Alive | 72 | NA   | NA |
| TCGA-BP-   | 1854 | 63dd7202 | female | white       | Alive | 67 | NA   | NA |
| TCGA-B0-NA |      | 18524601 | female | white       | Dead  | 77 | 885  | NA |
| TCGA-A3-   | 1493 | 12c4c4f1 | male   | white       | Alive | 57 | NA   | NA |
| TCGA-CW    | 2378 | 58ef1a13 | male   | white       | Alive | 52 | NA   | NA |
| TCGA-B0-   | 3944 | 9c377f9b | female | white       | Alive | 66 | NA   | NA |
| TCGA-CJ-NA |      | c4bbbcd2 | male   | white       | Dead  | 48 | 932  | NA |
| TCGA-BP-   | 1516 | 8958c2bf | male   | white       | Alive | 62 | NA   | NA |
| TCGA-AK-   | 369  | 0a93c52e | female | black or at | Alive | 71 | NA   | NA |
| TCGA-CW    | 2609 | 0487fc41 | male   | white       | Alive | 51 | NA   | NA |
| TCGA-B0-NA |      | 414056a2 | female | white       | Dead  | 80 | 1639 | NA |
| TCGA-CJ-   | 1520 | 9fe336a8 | male   | white       | Alive | 61 | NA   | NA |
| TCGA-A3-   | 617  | 9dc7812b | male   | white       | Alive | 49 | NA   | NA |
| TCGA-BP-NA |      | f8804530 | male   | white       | Dead  | 70 | 2601 | NA |
| TCGA-BP-   | 1879 | 830626c5 | male   | white       | Alive | 49 | NA   | NA |
| TCGA-A3-   | 1314 | 0b970feb | female | black or at | Alive | 51 | NA   | NA |
| TCGA-AK-   | 2865 | 3c5f27e9 | male   | white       | Alive | 58 | NA   | NA |
| TCGA-CJ-NA |      | 8fd493c5 | female | white       | Dead  | 48 | 336  | NA |
| TCGA-BP-   | 1502 | 2a9c4ce5 | female | white       | Alive | 43 | NA   | NA |
| TCGA-CJ-   | 1498 | 78048432 | female | black or at | Alive | 58 | NA   | NA |
| TCGA-DV    | 365  | fef57c51 | male   | black or at | Alive | 53 | NA   | NA |
| TCGA-B8-   | 528  | 09d7ce7a | male   | black or at | Alive | 60 | NA   | NA |
| TCGA-B0-   | 1604 | 46bc69a9 | male   | white       | Alive | 43 | NA   | NA |
| TCGA-BP-NA |      | 9b84d013 | female | white       | Dead  | 75 | 109  | NA |
| TCGA-BP-NA |      | e04bd954 | female | white       | Dead  | 79 | 1270 | NA |
| TCGA-B4-   | 7    | ab5266f6 | female | white       | Alive | 61 | NA   | NA |
| TCGA-A3-   | 0    | c33d0d12 | female | black or at | Alive | 65 | NA   | NA |
| TCGA-BP-   | 1413 | 89500416 | male   | white       | Alive | 54 | NA   | NA |
| TCGA-B0-   | 2246 | 576ea0ef | male   | white       | Alive | 73 | NA   | NA |
| TCGA-CZ-   | 330  | 393abcf7 | male   | white       | Dead  | 52 | 330  | NA |
| TCGA-CW    | 2552 | 4dd51edf | male   | white       | Alive | 68 | NA   | NA |
| TCGA-CJ-   | 2038 | 0631dc8c | female | white       | Alive | 59 | NA   | NA |
| TCGA-B4-   | 175  | 551e8a06 | male   | white       | Alive | 62 | NA   | NA |
| TCGA-B8-   | 1046 | e58f2c7b | female | white       | Alive | 41 | NA   | NA |
| TCGA-AK-   | 1853 | 351fb9f4 | female | white       | Dead  | 62 | 2241 | NA |

|             |      |                  |             |       |    |      |    |
|-------------|------|------------------|-------------|-------|----|------|----|
| TCGA-DV     | 355  | fc052a9d- female | white       | Alive | 29 | NA   | NA |
| TCGA-BP- NA |      | 34e8fbd8- female | white       | Dead  | 70 | 562  | NA |
| TCGA-BP-    | 1459 | b81998f2- male   | white       | Alive | 59 | NA   | NA |
| TCGA-CZ-    | 3267 | 291f45ab- female | white       | Alive | 79 | NA   | NA |
| TCGA-CZ-    | 1905 | 13e25128- male   | white       | Alive | 60 | NA   | NA |
| TCGA-B0- NA |      | 12adefc4- male   | white       | Dead  | 58 | 866  | NA |
| TCGA-BP-    | 182  | 270c9a0b- male   | white       | Alive | 57 | NA   | NA |
| TCGA-CJ-    | 2186 | 7ca06dbe- female | white       | Alive | 71 | NA   | NA |
| TCGA-BP- NA |      | c3cc716b- female | white       | Dead  | 73 | 329  | NA |
| TCGA-BP-    | 1063 | f1ed9155- male   | white       | Alive | 44 | NA   | NA |
| TCGA-B0- NA |      | f57690ba- male   | white       | Dead  | 63 | 342  | NA |
| TCGA-A3- NA |      | 2304b8f8- male   | white       | Dead  | 74 | 561  | NA |
| TCGA-CW     | 2271 | f1ae0181- male   | white       | Alive | 56 | NA   | NA |
| TCGA-B8-    | 1299 | b428463a- female | white       | Alive | 51 | NA   | NA |
| TCGA-CJ-    | 3229 | 3e976301- female | white       | Alive | 49 | NA   | NA |
| TCGA-B8-    | 909  | 59d18f0c- female | black or at | Alive | 62 | NA   | NA |
| TCGA-CZ-    | 59   | 878d1caa- male   | white       | Dead  | 84 | 59   | NA |
| TCGA-B0- NA |      | cf77fe39- (male  | white       | Dead  | 70 | 1986 | NA |
| TCGA-B0-    | 1778 | 75801b19- male   | white       | Alive | 57 | NA   | NA |
| TCGA-A3-    | 323  | a42103aa- male   | black or at | Alive | 37 | NA   | NA |
| TCGA-B8-    | 762  | a22d5ba2- male   | white       | Alive | 74 | NA   | NA |
| TCGA-EU-    | 551  | 2de427e2- female | white       | Alive | 47 | NA   | NA |
| TCGA-DV     | 1130 | c6454371- male   | white       | Alive | 41 | NA   | NA |
| TCGA-B4-    | 141  | 59f49821- female | white       | Alive | 61 | NA   | NA |
| TCGA-BP-    | 354  | 9a404208- female | white       | Alive | 55 | NA   | NA |
| TCGA-BP-    | 932  | 265f1d03- male   | white       | Alive | 60 | NA   | NA |
| TCGA-B0-    | 2782 | c91a4cc3- female | white       | Alive | 75 | NA   | NA |
| TCGA-B2-    | 952  | bbbce1ba- male   | white       | Alive | 61 | NA   | NA |
| TCGA-BP-    | 645  | e5eca191- male   | white       | Dead  | 56 | 645  | NA |
| TCGA-BP-    | 193  | 2d7e2ae4- male   | white       | Alive | 70 | NA   | NA |
| TCGA-BP-    | 29   | b6d4e2d5- male   | white       | Alive | 75 | NA   | NA |
| TCGA-B0- NA |      | 46194f7f- female | white       | Dead  | 77 | 637  | NA |
| TCGA-BP-    | 1843 | c22d25c2- female | white       | Alive | 55 | NA   | NA |
| TCGA-B2-    | 972  | 1adb05d4- male   | white       | Alive | 83 | NA   | NA |
| TCGA-B0- NA |      | 98ff8a6b- male   | white       | Dead  | 81 | 99   | NA |
| TCGA-BP-    | 1367 | a9f73fb6- male   | white       | Alive | 74 | NA   | NA |
| TCGA-CW     | 2017 | 7b4e529f- female | white       | Alive | 78 | NA   | NA |
| TCGA-B0-    | 3989 | 88c91a7b- male   | white       | Alive | 50 | NA   | NA |
| TCGA-B0-    | 1411 | f6d3e963- male   | white       | Alive | 46 | NA   | NA |
| TCGA-BP- NA |      | 57070e5b- male   | white       | Dead  | 52 | 1092 | NA |
| TCGA-B8-    | 523  | 78ec8bc9- male   | white       | Alive | 58 | NA   | NA |
| TCGA-AK-    | 2392 | c0171d4e- male   | white       | Alive | 69 | NA   | NA |
| TCGA-CZ- NA |      | f5759059- male   | white       | Dead  | 60 | 445  | NA |
| TCGA-BP-    | 1355 | d30f460b- male   | white       | Alive | 58 | NA   | NA |
| TCGA-BP- NA |      | 79e469c5- male   | white       | Dead  | 64 | 1912 | NA |
| TCGA-BP-    | 1107 | dd35edfd- male   | white       | Alive | 34 | NA   | NA |
| TCGA-BP-    | 2412 | 30208a4c- male   | white       | Alive | 55 | NA   | NA |
| TCGA-BP-    | 563  | 2a2f168c- male   | white       | Alive | 40 | NA   | NA |
| TCGA-BP-    | 372  | f72defb3- female | white       | Alive | 68 | NA   | NA |
| TCGA-CJ-    | 1952 | c0f7147e- female | white       | Alive | 42 | NA   | NA |
| TCGA-BP-    | 1140 | e548aeb2- male   | white       | Alive | 45 | NA   | NA |
| TCGA-A3-    | 1610 | 3372a7d2- female | white       | Dead  | 76 | 1610 | NA |
| TCGA-CJ- NA |      | e865d40a- male   | white       | Dead  | 90 | 0    | NA |
| TCGA-BP-    | 1177 | d6ea5cec- female | white       | Alive | 43 | NA   | NA |
| TCGA-B0- NA |      | 844ec449- male   | white       | Dead  | 60 | 793  | NA |
| TCGA-CJ- NA |      | 06197e26- female | white       | Dead  | 46 | 431  | NA |
| TCGA-CJ-    | 1531 | 07f596f7- male   | white       | Alive | 38 | NA   | NA |
| TCGA-CJ-    | 2283 | 804a6159- female | white       | Alive | 73 | NA   | NA |

|             |      |           |          |             |       |    |      |    |
|-------------|------|-----------|----------|-------------|-------|----|------|----|
| TCGA-B2-    | 656  | a682a2a3- | male     | white       | Alive | 79 | NA   | NA |
| TCGA-BP-    | 1133 | 3128d9bf- | male     | white       | Alive | 54 | NA   | NA |
| TCGA-AS-    | 43   | 8593764c- | male     | white       | Alive | 35 | NA   | NA |
| TCGA-AS-    | 1238 | e3aa5595- | male     | white       | Alive | 63 | NA   | NA |
| TCGA-B0-    | 2009 | f3a921d5- | female   | white       | Alive | 71 | NA   | NA |
| TCGA-CZ-    | 1997 | 4c474c70- | male     | white       | Alive | 58 | NA   | NA |
| TCGA-B0-    | 2430 | bb4a6123  | male     | white       | Alive | 57 | NA   | NA |
| TCGA-CJ- NA |      | 2890b330  | male     | white       | Dead  | 58 | 1625 | NA |
| TCGA-B0- NA |      | 8d4b602b  | female   | white       | Dead  | 76 | 202  | NA |
| TCGA-B0- NA |      | 6b1ff32f- | 7 female | white       | Dead  | 65 | 927  | NA |
| TCGA-BP-    | 2208 | 44143697- | male     | white       | Alive | 40 | NA   | NA |
| TCGA-CZ-    | 25   | 577847b9  | male     | white       | Dead  | 67 | 2419 | NA |
| TCGA-A3-    | 630  | 798d51ff- | male     | white       | Alive | 60 | NA   | NA |
| TCGA-A3-    | 574  | e1663694- | male     | white       | Alive | 69 | NA   | NA |
| TCGA-BP-    | 1371 | 9245a557- | male     | white       | Alive | 68 | NA   | NA |
| TCGA-CJ- NA |      | f2fca062- | male     | white       | Dead  | 59 | 1567 | NA |
| TCGA-BP-    | 1124 | a68bd706  | male     | white       | Alive | 57 | NA   | NA |
| TCGA-CW     | 2226 | 73fc6ae6- | female   | white       | Alive | 62 | NA   | NA |
| TCGA-B0- NA |      | 5b66c4ae- | male     | white       | Dead  | 75 | 42   | NA |
| TCGA-B8-    | 777  | eda2b871  | female   | white       | Alive | 70 | NA   | NA |
| TCGA-A3-    | 1018 | 2953131e- | male     | black or at | Alive | 47 | NA   | NA |
| TCGA-BP-    | 1625 | 7664c241- | female   | white       | Dead  | 53 | 1625 | NA |
| TCGA-B0- NA |      | 4cfe9a35- | male     | white       | Dead  | 63 | 600  | NA |
| TCGA-AK-    | 874  | 28e9b6f9- | male     | white       | Alive | 84 | NA   | NA |
| TCGA-B8-    | 435  | 828ad452- | female   | white       | Alive | 67 | NA   | NA |
| TCGA-B8-    | 1520 | 18325fdc- | female   | white       | Alive | 63 | NA   | NA |
| TCGA-BP-    | 1834 | c129b63f- | male     | white       | Alive | 63 | NA   | NA |
| TCGA-CJ-    | 3736 | 4c325ee1- | male     | white       | Alive | 60 | NA   | NA |
| TCGA-A3-    | 1624 | 21eea125- | male     | white       | Alive | 75 | NA   | NA |
| TCGA-B4-    | 155  | 75e02a42- | male     | white       | Alive | 65 | NA   | NA |
| TCGA-AK-    | 1423 | d7155ce6- | male     | white       | Alive | 45 | NA   | NA |
| TCGA-A3-    | 1491 | 8ee720b5- | male     | not report  | Alive | 67 | NA   | NA |
| TCGA-B0- NA |      | ff127be4- | male     | white       | Dead  | 65 | 1588 | NA |
| TCGA-BP-    | 1308 | 82f069c4- | male     | white       | Alive | 54 | NA   | NA |
| TCGA-DV     | 2004 | aba26e6b  | female   | black or at | Alive | 40 | NA   | NA |
| TCGA-CJ-    | 841  | d1e4f4c0- | male     | white       | Dead  | 58 | 841  | NA |
| TCGA-B0- NA |      | 58dee518  | male     | white       | Dead  | 61 | 1238 | NA |
| TCGA-CZ-    | 1787 | dc43cfe0- | female   | white       | Alive | 59 | NA   | NA |
| TCGA-CJ-    | 1906 | f2b93fbd- | male     | white       | Alive | 54 | NA   | NA |
| TCGA-CJ-    | 1776 | 53dede5a  | female   | white       | Alive | 85 | NA   | NA |
| TCGA-CJ-    | 3205 | 942c0088- | male     | white       | Alive | 47 | NA   | NA |
| TCGA-CW     | 2489 | 7080bc0a- | female   | white       | Alive | 51 | NA   | NA |
| TCGA-AK-    | 3583 | 97fee782- | male     | white       | Alive | 65 | NA   | NA |
| TCGA-CW NA  |      | bbdaa931  | male     | white       | Dead  | 61 | 41   | NA |
| TCGA-CZ-    | 1446 | 5e248b21- | female   | not report  | Dead  | 76 | 2564 | NA |
| TCGA-EU-    | 127  | 28c8c2c6- | male     | white       | Alive | 81 | NA   | NA |
| TCGA-BP-    | 1794 | 3b064b7e  | female   | white       | Alive | 63 | NA   | NA |
| TCGA-BP-    | 13   | 3c4ed50e- | male     | white       | Alive | 69 | NA   | NA |
| TCGA-B0- NA |      | efb088d9- | female   | white       | Dead  | 69 | 834  | NA |
| TCGA-BP-    | 840  | b5f51cf6- | male     | white       | Alive | 61 | NA   | NA |
| TCGA-B0- NA |      | d99f31f7- | male     | white       | Dead  | 52 | 1200 | NA |
| TCGA-MV     | 498  | b123e7c1- | female   | black or at | Alive | 72 | NA   | NA |
| TCGA-BP-    | 1670 | c15d5920- | male     | white       | Alive | 65 | NA   | NA |
| TCGA-BP-    | 2746 | d9f1bb02- | male     | white       | Alive | 74 | NA   | NA |
| TCGA-BP-    | 1018 | 4c3e4727- | male     | white       | Alive | 53 | NA   | NA |
| TCGA-DV     | 1729 | 0ff579a1- | female   | white       | Alive | 52 | NA   | NA |
| TCGA-CZ- NA |      | b602a73b  | female   | white       | Dead  | 86 | 73   | NA |
| TCGA-BP-    | 1785 | b3a9b0be  | male     | white       | Alive | 58 | NA   | NA |

|             |      |           |        |             |       |    |      |    |
|-------------|------|-----------|--------|-------------|-------|----|------|----|
| TCGA-A3-    | 735  | 10c03d66- | male   | black or at | Dead  | 59 | 735  | NA |
| TCGA-CJ- NA |      | d2664fde- | female | white       | Dead  | 54 | 782  | NA |
| TCGA-A3-    | 945  | d4815225  | male   | white       | Alive | 79 | NA   | NA |
| TCGA-BP- NA |      | 83bdd67b  | female | white       | Dead  | 72 | 2343 | NA |
| TCGA-B2-    | 1092 | 424e5c99- | male   | white       | Alive | 73 | NA   | NA |
| TCGA-CZ-    | 1315 | 7fc6b44d- | male   | white       | Dead  | 86 | 1315 | NA |
| TCGA-CZ-    | 1928 | 88e7ce26- | female | white       | Alive | 51 | NA   | NA |
| TCGA-CZ- NA |      | 226ce515- | male   | white       | Dead  | 63 | 446  | NA |
| TCGA-CJ-    | 1496 | 830b8de5  | female | white       | Alive | 62 | NA   | NA |
| TCGA-CZ-    | 2754 | f00b7956- | male   | white       | Alive | 62 | NA   | NA |
| TCGA-CJ-    | 3480 | 61c75ffb- | male   | white       | Alive | 49 | NA   | NA |
| TCGA-B0-    | 26   | 26cc2c84- | male   | white       | Dead  | 61 | 65   | NA |
| TCGA-B0-    | 3744 | 0a6a375b- | female | white       | Alive | 39 | NA   | NA |
| TCGA-BP- NA |      | c0e26587- | male   | white       | Dead  | 79 | 2256 | NA |
| TCGA-BP- NA |      | 23c7555b- | male   | white       | Dead  | 60 | 822  | NA |
| TCGA-A3-    | 468  | 96c38b74- | female | black or at | Alive | 57 | NA   | NA |
| TCGA-BP-    | 204  | 382291d3  | male   | white       | Alive | 79 | NA   | NA |
| TCGA-BP- NA |      | d6625c4d  | male   | white       | Dead  | 58 | 211  | NA |
| TCGA-CZ-    | 373  | 883c37e2- | male   | white       | Alive | 61 | NA   | NA |
| TCGA-BP- NA |      | d9208e7b  | male   | white       | Dead  | 40 | 1034 | NA |
| TCGA-DV NA  |      | 936c217f- | female | black or at | Dead  | 55 | 727  | NA |
| TCGA-BP-    | 603  | 8f936d84- | male   | white       | Alive | 72 | NA   | NA |
| TCGA-CJ-    | 4067 | 310c31bf- | male   | white       | Alive | 47 | NA   | NA |
| TCGA-B8-    | 495  | f2b90375- | female | black or at | Alive | 54 | NA   | NA |
| TCGA-A3-    | 1385 | 8d02978a  | male   | white       | Alive | 79 | NA   | NA |
| TCGA-3Z-    | 385  | 2b1dea0a  | male   | black or at | Alive | 69 | NA   | NA |
| TCGA-B0-    | 1733 | 62f5ceb7- | female | white       | Alive | 59 | NA   | NA |
| TCGA-DV     | 2016 | ea854858- | male   | white       | Alive | 37 | NA   | NA |
| TCGA-BP-    | 1014 | fae200ed- | male   | white       | Alive | 42 | NA   | NA |
| TCGA-B0-    | 1790 | 4e3334e2- | male   | white       | Alive | 77 | NA   | NA |
| TCGA-CJ-    | 1435 | 820ddb1a  | male   | white       | Alive | 51 | NA   | NA |
| TCGA-B0-    | 183  | 52d80054  | female | white       | Dead  | 60 | 183  | NA |
| TCGA-6D-    | 362  | d3b47e53  | female | black or at | Alive | 68 | NA   | NA |
| TCGA-B8-    | 822  | d4159990  | female | white       | Alive | 63 | NA   | NA |
| TCGA-BP- NA |      | ffed886e- | male   | white       | Dead  | 76 | 1111 | NA |
| TCGA-CJ-    | 1521 | 83444c79- | female | white       | Alive | 65 | NA   | NA |
| TCGA-B0-    | 1485 | 73512f9d- | male   | white       | Alive | 56 | NA   | NA |
| TCGA-A3-    | 1106 | e4da964a  | male   | white       | Alive | 53 | NA   | NA |
| TCGA-B0-    | 3205 | 3b2b492b  | male   | white       | Alive | 45 | NA   | NA |
| TCGA-BP-    | 177  | 6ccd4657- | male   | white       | Alive | 58 | NA   | NA |
| TCGA-A3-    | 1120 | 9fb55e0b- | male   | white       | Alive | 67 | NA   | NA |
| TCGA-B8-    | 830  | 9256867c- | male   | black or at | Alive | 69 | NA   | NA |
| TCGA-BP-    | 374  | 9ecdde9c- | female | asian       | Alive | 62 | NA   | NA |
| TCGA-CJ-    | 1955 | e002c248- | male   | white       | Alive | 57 | NA   | NA |
| TCGA-CJ- NA |      | d232f22d- | female | white       | Dead  | 57 | 819  | NA |
| TCGA-BP- NA |      | e719b7f3- | male   | white       | Dead  | 70 | 1133 | NA |
| TCGA-B0- NA |      | 74fc9f65- | male   | white       | Dead  | 63 | 1045 | NA |
| TCGA-BP-    | 1071 | b472c982- | male   | white       | Alive | 46 | NA   | NA |
| TCGA-B2-    | 919  | ed2e9354  | male   | white       | Alive | 79 | NA   | NA |
| TCGA-CZ- NA |      | 74749fe8- | male   | white       | Dead  | 63 | 561  | NA |
| TCGA-CW NA  |      | 88fc4bc4- | female | white       | Dead  | 73 | 1964 | NA |
| TCGA-AK-    | 3728 | 9da334ed  | male   | white       | Alive | 62 | NA   | NA |
| TCGA-B0-    | 3392 | 794aeb92- | female | white       | Alive | 53 | NA   | NA |
| TCGA-CZ- NA |      | e0127e51- | male   | white       | Dead  | 83 | 311  | NA |
| TCGA-B8-    | 788  | 65d56c51- | male   | black or at | Alive | 63 | NA   | NA |
| TCGA-B0- NA |      | 8d769b38  | female | asian       | Dead  | 68 | 1230 | NA |
| TCGA-B8-    | 737  | 89ea18fc- | male   | white       | Alive | 43 | NA   | NA |
| TCGA-B0- NA |      | bcf26561- | female | white       | Dead  | 88 | 485  | NA |

|             |      |           |        |             |       |    |      |    |  |
|-------------|------|-----------|--------|-------------|-------|----|------|----|--|
| TCGA-B0-    | 3841 | c814c26c- | male   | white       | Alive | 53 | NA   | NA |  |
| TCGA-BP-    | 2263 | c558dffe- | male   | white       | Alive | 53 | NA   | NA |  |
| TCGA-AK-    | 2217 | 08c1bb22  | male   | white       | Alive | 72 | NA   | NA |  |
| TCGA-A3-    | 1070 | 46240f32- | male   | black or at | Dead  | 51 | 1696 | NA |  |
| TCGA-CJ-    | 2423 | dbe16232  | male   | white       | Alive | 63 | NA   | NA |  |
| TCGA-B0-    | 2630 | dfd2c288- | male   | white       | Alive | 50 | NA   | NA |  |
| TCGA-BP-    | 2361 | 4cfe4f31- | male   | black or at | Alive | 69 | NA   | NA |  |
| TCGA-BP-    | 1165 | 315b6dea  | male   | white       | Alive | 56 | NA   | NA |  |
| TCGA-CJ- NA |      | 772e3aed- | female | white       | Dead  | 52 | 2227 | NA |  |
| TCGA-AK-    | 3343 | 1b3f2411- | male   | white       | Alive | 68 | NA   | NA |  |
| TCGA-BP-    | 1862 | db601d82  | female | white       | Alive | 54 | NA   | NA |  |
| TCGA-B0- NA |      | f184de71- | female | white       | Dead  | 75 | 2145 | NA |  |
| TCGA-B0-    | 3431 | 31a0dd95  | female | white       | Alive | 66 | NA   | NA |  |
| TCGA-BP-    | 118  | dc2208d9  | male   | white       | Alive | 58 | NA   | NA |  |
| TCGA-B0- NA |      | 8aaa4e25- | male   | white       | Dead  | 62 | 333  | NA |  |
| TCGA-CJ- NA |      | 822cf6c1- | male   | black or at | Dead  | 62 | 574  | NA |  |
| TCGA-B0- NA |      | 3f72d63f- | male   | white       | Dead  | 76 | 1337 | NA |  |
| TCGA-B0-    | 1608 | ae55b2d3  | male   | white       | Alive | 40 | NA   | NA |  |
| TCGA-CZ- NA |      | 6205c2d8- | male   | white       | Dead  | 41 | 946  | NA |  |
| TCGA-CJ-    | 1560 | 692f9978- | male   | white       | Alive | 50 | NA   | NA |  |
| TCGA-B0- NA |      | 9ceefc7e- | male   | black or at | Dead  | 72 | 1913 | NA |  |
| TCGA-CW NA  |      | 5f53ace3- | male   | white       | Dead  | 32 | 571  | NA |  |
| TCGA-BP-    | 2660 | 5003a0cb- | male   | white       | Alive | 49 | NA   | NA |  |
| TCGA-B0- NA |      | e33dff22- | male   | white       | Dead  | 60 | 1980 | NA |  |
| TCGA-B0- NA |      | 3dd36758  | male   | white       | Dead  | 47 | 478  | NA |  |
| TCGA-B8-    | 26   | 766999d7  | male   | white       | Alive | 65 | NA   | NA |  |
| TCGA-DV NA  |      | ef2d7ef5- | male   | black or at | Dead  | 59 | 1626 | NA |  |
| TCGA-A3-    | 340  | 2711b4a4  | male   | black or at | Alive | 75 | NA   | 65 |  |
| TCGA-B0- NA |      | 62c6edc7- | female | white       | Dead  | 76 | 770  | NA |  |
| TCGA-BP-    | 1132 | d3638a1f- | male   | white       | Alive | 56 | NA   | NA |  |
| TCGA-BP-    | 1666 | 513a4de3- | female | white       | Alive | 75 | NA   | NA |  |
| TCGA-B0-    | 665  | 03ae8fdb- | female | white       | Alive | 59 | NA   | NA |  |
| TCGA-BP- NA |      | c285ada3- | male   | white       | Dead  | 72 | 952  | NA |  |
| TCGA-B0- NA |      | a46f36c3- | male   | white       | Dead  | 78 | 1111 | NA |  |
| TCGA-A3-    | 567  | 8ed08632  | male   | not report  | Alive | 54 | NA   | NA |  |
| TCGA-CJ-    | 1924 | 2d8da564  | male   | white       | Alive | 51 | NA   | NA |  |
| TCGA-B0- NA |      | 9d202594  | male   | white       | Dead  | 51 | 69   | NA |  |
| TCGA-B0- NA |      | b764e6a1- | male   | white       | Dead  | 81 | 1019 | NA |  |
| TCGA-G6-    | 2133 | 1d37becb  | female | black or at | Alive | 81 | NA   | 40 |  |
| TCGA-BP-    | 1266 | 9aa63985- | male   | white       | Alive | 56 | NA   | NA |  |
| TCGA-B0- NA |      | 479035f0- | female | white       | Dead  | 79 | 362  | NA |  |
| TCGA-CZ-    | 2128 | 6b79d20c  | male   | white       | Alive | 69 | NA   | NA |  |
| TCGA-DV     | 1398 | 4b2ec8aa- | female | white       | Alive | 67 | NA   | NA |  |
| TCGA-CW     | 3146 | 3f93d1cf- | male   | white       | Alive | 73 | NA   | NA |  |
| TCGA-B8-    | 722  | ab954d5e  | female | white       | Alive | 61 | NA   | NA |  |
| TCGA-AK-    | 1508 | 0709749f- | female | white       | Alive | 85 | NA   | NA |  |
| TCGA-CZ-    | 386  | 99f59583- | female | not report  | Alive | 72 | NA   | NA |  |
| TCGA-CJ-    | 3936 | ceb7cd9a- | male   | white       | Alive | 70 | NA   | NA |  |
| TCGA-A3-    | 3    | 060b2104  | male   | black or at | Alive | 78 | NA   | NA |  |
| TCGA-BP- NA |      | 781acafa- | male   | white       | Dead  | 75 | 1463 | NA |  |
| TCGA-AK- NA |      | 2ed3296a- | female | white       | Dead  | 71 | 683  | NA |  |
| TCGA-B0- NA |      | 1e758394- | male   | white       | Dead  | 79 | 307  | NA |  |
| TCGA-CJ- NA |      | 2939c03a- | female | white       | Dead  | 44 | 552  | NA |  |
| TCGA-B8-    | 1525 | b125ff14- | male   | white       | Alive | 57 | NA   | NA |  |
| TCGA-CZ-    | 774  | 86f68b7d- | male   | white       | Alive | 82 | NA   | NA |  |
| TCGA-BP- NA |      | 8be7d2e2  | male   | white       | Dead  | 67 | 1589 | NA |  |
| TCGA-BP-    | 400  | 8d5d69a4  | female | white       | Alive | 72 | NA   | NA |  |
| TCGA-B0-    | 2609 | 1d176c53- | male   | white       | Alive | 69 | NA   | NA |  |



|            |      |                  |             |       |    |      |    |
|------------|------|------------------|-------------|-------|----|------|----|
| TCGA-A3-NA |      | 897f85ec- male   | white       | Dead  | 68 | 137  | NA |
| TCGA-CJ-   | 1889 | 740e8238- male   | white       | Alive | 78 | NA   | NA |
| TCGA-B0-   | 1755 | 4298ccdb- female | white       | Alive | 75 | NA   | NA |
| TCGA-CW NA |      | 9fd9104b- male   | white       | Dead  | 51 | 1075 | NA |
| TCGA-CJ-   | 2554 | 06d86d68- male   | white       | Alive | 49 | NA   | NA |
| TCGA-CZ-   | 18   | fcecafa8- female | white       | Alive | 62 | NA   | NA |
| TCGA-B8-   | 194  | 98dea82b- male   | white       | Alive | 53 | NA   | NA |
| TCGA-BP-   | 714  | 5dc807f2- male   | white       | Alive | 59 | NA   | NA |
| TCGA-CJ-   | 1499 | 3972ae59- male   | white       | Alive | 58 | NA   | NA |
| TCGA-CZ-   | 2873 | a7ddd737- male   | white       | Alive | 55 | NA   | NA |
| TCGA-A3-   | 2504 | e4cc8898- female | white       | Alive | 82 | NA   | NA |
| TCGA-B0-NA |      | 03905b58- female | white       | Dead  | 49 | 1657 | NA |
| TCGA-BP-NA |      | eeacbbdc- female | white       | Dead  | 59 | 953  | NA |
| TCGA-BP-NA |      | 500636a5- female | white       | Dead  | 59 | 480  | NA |
| TCGA-B8-   | 1380 | 8c6720ef- female | white       | Alive | 73 | NA   | NA |
| TCGA-BP-   | 1487 | e173c4ba- male   | white       | Alive | 40 | NA   | NA |
| TCGA-CW NA |      | 09c4ea05- male   | white       | Dead  | 74 | 164  | NA |
| TCGA-B0-NA |      | d51fa004- female | white       | Dead  | 53 | 459  | NA |
| TCGA-B0-   | 1274 | b6abbdcc- male   | white       | Alive | 52 | NA   | NA |
| TCGA-BP-   | 2839 | e7c159b7- female | white       | Alive | 60 | NA   | NA |
| TCGA-A3-   | 3    | b39d6675- female | black or at | Alive | 59 | NA   | NA |
| TCGA-CJ-   | 2353 | 818022ea- male   | white       | Dead  | 67 | 3554 | NA |
| TCGA-B0-NA |      | 759238f2- female | white       | Dead  | 78 | 1121 | NA |
| TCGA-AK-   | 2508 | 5cf9d9fe- male   | white       | Alive | 58 | NA   | NA |
| TCGA-BP-NA |      | ed97aeed- female | white       | Dead  | 65 | 475  | NA |
| TCGA-CZ-   | 693  | f2806652- male   | white       | Alive | 38 | NA   | NA |
| TCGA-B0-NA |      | e4769374- female | white       | Dead  | 82 | 2386 | NA |
| TCGA-BP-   | 2257 | 028d32fc- female | white       | Alive | 45 | NA   | NA |
| TCGA-A3-   | 873  | 136c95cd- male   | white       | Alive | 46 | NA   | NA |
| TCGA-BP-   | 3074 | 0242658f- female | white       | Alive | 65 | NA   | NA |
| TCGA-BP-   | 454  | cc353686- male   | white       | Alive | 57 | NA   | NA |
| TCGA-BP-   | 3037 | 3c1b6de7- female | white       | Alive | 64 | NA   | NA |
| TCGA-B2-NA |      | 52d73201- female | black or at | Dead  | 72 | 51   | NA |
| TCGA-BP-   | 845  | 6ccabcd0- male   | white       | Dead  | 75 | 845  | NA |
| TCGA-CJ-   | 1883 | 3ea341e3- male   | black or at | Alive | 57 | NA   | NA |
| TCGA-A3-   | 0    | f38a6799- female | black or at | Alive | 74 | NA   | NA |
| TCGA-BP-   | 2859 | 4978eb8d- male   | white       | Alive | 43 | NA   | NA |
| TCGA-B0-NA |      | b7143068- male   | white       | Dead  | 69 | 587  | NA |
| TCGA-CJ-NA |      | 6ab00314- male   | white       | Dead  | 65 | 2299 | NA |
| TCGA-AK-   | 2087 | 17d053f2- male   | white       | Alive | 72 | NA   | NA |
| TCGA-CZ-   | 1943 | f06bdea2- male   | white       | Dead  | 39 | 2105 | NA |
| TCGA-B8-   | 431  | 04beccb3- female | black or at | Alive | 60 | NA   | NA |
| TCGA-BP-   | 1871 | ec6aa756- male   | white       | Alive | 46 | NA   | NA |
| TCGA-CJ-NA |      | b7994839- male   | white       | Dead  | 62 | 1200 | NA |
| TCGA-BP-   | 1885 | a50fe35a- female | white       | Alive | 57 | NA   | NA |
| TCGA-AK-NA |      | c5265ca6- male   | white       | Dead  | 37 | 885  | NA |
| TCGA-G6-   | 305  | 28011111- male   | black or at | Dead  | 55 | 313  | NA |
| TCGA-A3-   | 319  | 659294b9- male   | asian       | Alive | 50 | NA   | NA |
| TCGA-CJ-   | 1373 | 4519a839- female | white       | Alive | 69 | NA   | NA |
| TCGA-B4-   | 365  | d0f908c5- female | white       | Alive | 68 | NA   | NA |
| TCGA-B8-   | 36   | d62d39f9- male   | white       | Alive | 62 | NA   | NA |
| TCGA-B0-   | 1175 | 439794a8- female | white       | Alive | 69 | NA   | NA |
| TCGA-A3-   | 16   | 3cbca837- female | white       | Alive | 77 | NA   | NA |
| TCGA-BP-   | 1731 | 6fbf13b2- male   | white       | Alive | 46 | NA   | NA |
| TCGA-AK-   | 3331 | b2feca3f- male   | white       | Alive | 40 | NA   | NA |
| TCGA-BP-NA |      | 2913faf2- female | white       | Dead  | 76 | 2    | NA |
| TCGA-BP-   | 408  | 5daf4808- male   | white       | Alive | 39 | NA   | NA |
| TCGA-CZ-   | 1683 | 6b0c1e54- male   | white       | Alive | 63 | NA   | NA |

|            |      |          |        |       |       |    |      |    |
|------------|------|----------|--------|-------|-------|----|------|----|
| TCGA-B2-   | 417  | 73cb1350 | male   | white | Dead  | 46 | 1003 | NA |
| TCGA-B0-NA |      | 5f0f03c2 | male   | white | Dead  | 65 | 43   | NA |
| TCGA-BP-   | 433  | c01afa58 | male   | asian | Alive | 44 | NA   | NA |
| TCGA-CJ-   | 3639 | beef6a78 | female | white | Alive | 63 | NA   | NA |
| TCGA-BP-NA |      | 037c691e | female | white | Dead  | 74 | 344  | NA |
| TCGA-BP-   | 1495 | 5358b8c7 | female | white | Alive | 58 | NA   | NA |
| TCGA-AK-   | 2868 | fa543627 | male   | white | Alive | 48 | NA   |    |
| TCGA-BP-NA |      | 9490cd1e | female | white | Dead  | 78 | 1590 | NA |
| TCGA-BP-   | 3377 | 1cdb170b | male   | white | Alive | 69 | NA   | NA |

ked
